# Supplementary material
Source: PubMed Central journal article supplement (PMC5960979)
Supplement: NIHMS954728-supplement-supplement_1.pdf [file NIHMS954728-supplement-supplement_1.pdf]

## Appendix

**Table SI.** Variables associated with postoperative myocardial infarction in stepwise logistic regression analysis (VQI all-procedures model 2012–2014)

| Risk factor              | Coefficient | SE <sup>a</sup> | OR  | P value <sup>a</sup> |
|--------------------------|-------------|-----------------|-----|----------------------|
| Intercept                | −5.82       | 0.14            | —   | —                    |
| Procedure                |             |                 |     |                      |
| CEA (referent)           | 0           | —               | —   | —                    |
| EVAR                     | 0.17        | 0.16            | 1.2 | 0.2901               |
| INFRA                    | 1.12        | 0.09            | 3.1 | <0.0001              |
| SUPRA                    | 1.60        | 0.15            | 4.9 | <0.0001              |
| OAAA                     | 1.91        | 0.13            | 6.7 | <0.0001              |
| Age                      |             |                 |     |                      |
| <60 (referent)           | 0           | —               | —   | —                    |
| 60–69                    | 0.44        | 0.13            | 1.6 | 0.0006               |
| 70–79                    | 0.64        | 0.13            | 1.9 | <0.0001              |
| ≥80                      | 1.10        | 0.14            | 3.0 | <0.0001              |
| Creatinine               |             |                 |     |                      |
| <1.8                     | 0           | —               | —   | —                    |
| ≥1.8                     | 0.76        | 0.11            | 2.1 | <0.0001              |
| On dialysis              | 0.64        | 0.16            | 1.9 | <0.0001              |
| Stress test              |             |                 |     |                      |
| Not performed (referent) | 0           | —               | —   | —                    |
| Normal                   | −0.15       | 0.09            | 0.9 | 0.0967               |
| Abnormal                 | 0.46        | 0.11            | 1.6 | <0.0001              |
| CAD                      |             |                 |     |                      |
| None                     | 0           | —               | —   | —                    |
| Asymptomatic             | 0.40        | 0.09            | 1.5 | <0.0001              |
| Symptomatic              | 0.76        | 0.09            | 2.1 | <0.0001              |
| Diabetes                 |             |                 |     |                      |
| None (referent)          | 0           | —               | —   | —                    |
| Diet controlled          | 0.18        | 0.15            | 1.2 | 0.2251               |
| noninsulin medication    | 0.20        | 0.08            | 1.2 | 0.0152               |
| Insulin                  | 0.39        | 0.09            | 1.5 | <0.0001              |
| CHF                      |             |                 |     |                      |
| None (referent)          | 0           | —               | —   | —                    |
| Asymptomatic             | 0.44        | 0.10            | 1.5 | <0.0001              |
| Symptomatic              | 0.50        | 0.13            | 1.7 | <0.0001              |

AUC, area under receiver-operating characteristic curve; OR, odds ratio; SE, standard error; SUPRA, suprainguinal bypass.

AUC: 0.75 (CI: 0.73–0.76), internal validation AUC: 0.75 (CI: 0.73–76), external validation AUC: 0.76 (CI 0.73–0.78).

<sup>a</sup>Standard errors and P values are based on a robust covariance matrix that accounts for clustering of observations on medical center.
